### Prediction of major bleeding in patients receiving DOACs for venous thromboembolism: a prospective cohort study

M.C. Vedovati<sup>1</sup>, A. Mancuso<sup>1</sup>, L. Pierpaoli<sup>2</sup>, U. Paliani<sup>3</sup>, S. Conti<sup>4</sup>, A. Ascani<sup>5</sup>, G. Galeotti<sup>3</sup>, F. Di Filippo<sup>2</sup>, C. Caponi<sup>3</sup>, G. Agnelli<sup>1</sup>, C. Becattini<sup>1</sup>

<sup>1</sup>University of Perugia, Internal and Cardiovascular Medicine – Stroke Unit, Perugia, Italy; <sup>2</sup>Santa Maria delle Croci Hospital, Ravenna, Italy;

<sup>3</sup>Hospital of Città di Castello, Città di Castello, Italy; <sup>4</sup>S. Matteo degli Infermi Hospital, Spoleto, Italy; <sup>5</sup>S. Maria Hospital, Terni, Italy

**Background:** The accuracy of currently available bleeding scores in patients on treatment with direct oral anticoagulants (DOACs) for venous thromboembolism (VTE) is undefined.

**Purpose:** In a prospective cohort of patients with VTE treated with DOACs, we evaluated the accuracy of the ATRIA, HAS-BLED, Kujjer, ORBIT, RIETE and VTE-BLEED risk scores in predicting major bleeding (according to ISTH definition).

**Methods:** The accuracy of different scores to correctly classify subjects into a defined risk category was assessed by the c-statistic.

**Results:** Overall, 1141 patients were evaluated and 1034 included in the study. The index event was pulmonary embolism in 509 patients (49.2%) and proximal deep vein thrombosis in the remaining patients (50.8%). During the 12-month study period, 26 major bleedings occurred in 25 patients

(2.8% patient-year): 14 major bleedings occurred in the first 6 months of treatment and 12 from 6 to 12 months in the 654 patients remained on treatment.

In the 12-month study period, the VTE-BLEED score showed the best predictive value for bleeding complications (c-statistics 0.674, 95% CI 0.593–0.755). The lowest incidence of major bleeding (0.3%) was observed in the low risk category of VTE-BLEED which includes 38% of patients. The highest incidence of major bleeding (7.1%) was observed in the high-risk category of ORBIT which includes 10.9% of patients.

**Conclusions:** The VTE-BLEED score had the best accuracy in predicting major bleeding during treatment with DOACs for VTE. Whether the VTE-BLEED score can be used for decision making on anticoagulation should be tested in a management study.
